# Supplementary material for: Effect of comorbid pulmonary disease on the severity of COVID‐19: A systematic review and meta‐analysis
Source: PubMed Central journal article supplement (PMC8207055; doi:10.1111/resp.14049), 2021-05-06

# Effect of comorbid pulmonary disease on severity of COVID-19: A systematic review & meta-analysis

**Prevalence of COPD in patients with severe vs. non-severe COVID-19**

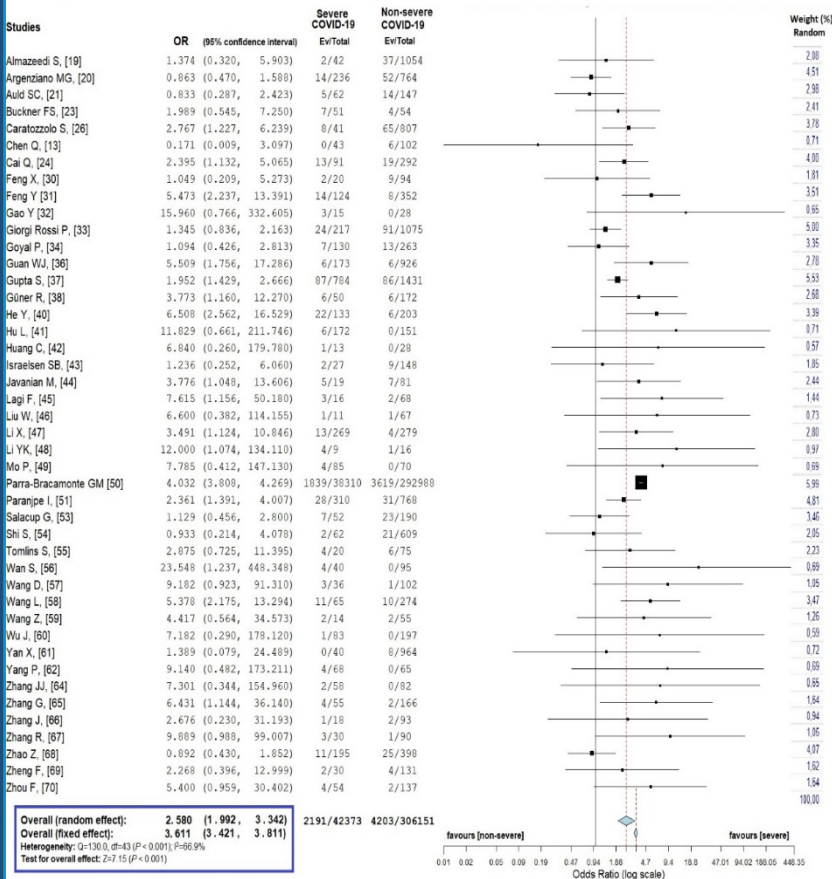

## Summary Points

Comorbid COPD and chronic respiratory diseases (CRD) were clearly associated with higher severity of COVID-19; however, no association between asthma and severe COVID-19 was identified.

\*

Questions remain regarding the relationships between COVID-19 and the severity of COPD and asthma, as well as the relationship of COVID-19 with other pulmonary conditions, including interstitial lung diseases, bronchiectasis, and cystic fibrosis.

\*

The potential impact of greater age of patients with COPD compared to the average patients with asthma should be an important component for future analysis.

**Prevalence of CRD in patients with severe vs. non-severe COVID-19**

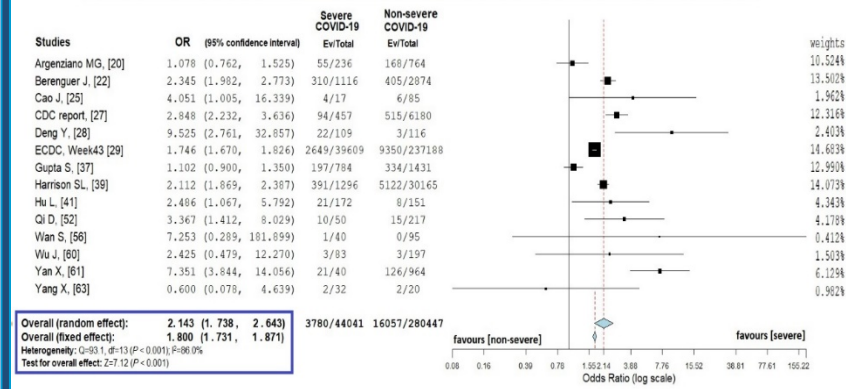

**Prevalence of asthma in patients with severe vs. non-severe COVID-19**

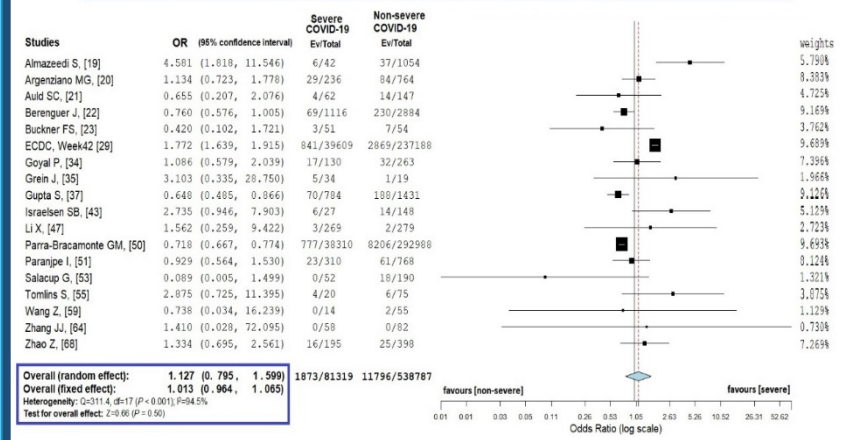

Supplement: RESP-26-552-s001.pdf [file RESP-26-552-s001.pdf]
